# Supplementary material for: PSTPIP2 ameliorates aristolochic acid nephropathy by suppressing interleukin-19-mediated neutrophil extracellular trap formation
Source: eLife journal article supplement (doi:10.7554/elife.89740), 2024-02-05
Supplement: fig1-figsupp1-data1 [file elife-89740-fig1-figsupp1-data1-v2.zip]

## Sheet: Figure 1-figure supplement 1B
Figure 1-figure supplement 1B-Serum creatinine (Cr) assay at various times after AAI treatment (n = 6).
Treatment AAI(10mg/kg)	0d	1d	3d	5d
Cr (μmol/L)	6.74404	13.0082	45.7015	175.216
	3.54488	15.9855	30.6964	80.8304
	7.15683	15.4076	34.9173	77.1204
	10.356	21.0371	31.068	87.7189
	3.59647	10.0464	35.877	112.951
	4.62846	13.3539	56.1711	110.154

## Sheet: Figure 1-figure supplement 1C
Figure 1-figure supplement 1C-Blood urea nitrogen (BUN) assay at various times after AAI treatment (n = 6).
Treatment AAI(10mg/kg)	0d	1d	3d	5d
BUN(mmol/L)	5.65524	7.55133	10.1302	13.5157
	5.81494	6.58488	7.18077	11.9281
	5.17144	5.15774	10.7211	10.9981
	5.53311	6.31948	9.54932	10.8102
	5.3922	6.27441	14.4166	13.5815
	5.68107	5.32799	8.10215	13.2644

## Sheet: Figure 1-figure supplement 1D
Figure 1-figure supplement 1D-Immunohistochemistry of kidney injury molecule-1 (KIM-1) in different groups of kidney tissues. Positively stained areas were measured using Image-Pro Plus 6.0 (Media Cybernetics, Inc., Rockville, MD, USA) (n = 6).
Treatment AAI(10mg/kg)	0d	1d	3d	5d
Positive area(%)	0.382	1.205	4.837	9.951
	0.63	1.008	3.705	7.981
	0.649	1.23	3.927	10.672
	0.401	1.069	3.697	14.365
	0.64	1.215	4.018	11.599
	0.456	1.224	2.415	15.479

## Sheet: Figure 1-figure supplement 1E
Figure 1-figure supplement 1E-Protein level of KIM-1 assessed by western blotting at various times after AAI treatment (n = 6).
Treatment AAI(10mg/kg)	0d	1d	3d	5d
Ratio (KIM-1/β-actin)	1.04553	2.13304	2.66526	4.97821
	1.79149	1.79002	3.02965	3.58246
	0.924559	1.55517	2.63664	4.96022
	0.740079	0.758519	2.32821	3.17501
	0.779425	2.12992	2.9014	4.0082
	0.71891	1.90835	2.76856	4.24002

## Sheet: Figure 1-figure supplement 1F
Figure 1-figure supplement 1F-Protein level of KIM-1 after treatment with different AAI concentrations (n = 3).
Treatment AAI(μM/24h)	0	5	10	20	40	80
Ratio (KIM-1/β-actin)	1.45226	1.39267	2.23414	3.71812	3.1465	2.76092
	0.720651	1.75114	1.11451	2.66594	3.28349	3.2695
	0.827094	0.919553	1.35258	2.84117	3.24055	3.366

## Sheet: Figure 1-figure supplement 1G
Figure 1-figure supplement 1G- Level of cleaved caspase-3 at different times after AAI (40 μM) treatment (n = 3).
Treatment AAI(40μM)	0h	12h	16h	20h	24h
Ratio (CL-caspase-3/β-actin)	1.15011	0.964282	1.23531	0.827791	1.75842
	0.924135	1.21177	0.823432	1.47753	2.03582
	0.925755	0.892617	1.13845	1.06425	1.87718
