# Supplementary material for: PSTPIP2 ameliorates aristolochic acid nephropathy by suppressing interleukin-19-mediated neutrophil extracellular trap formation
Source: eLife journal article supplement (doi:10.7554/elife.89740), 2024-02-05
Supplement: fig2-figsupp1-data1 [file elife-89740-fig2-figsupp1-data1-v2.zip]

## Sheet: Figure 2-figure supplement 1A
Figure 2-figure supplement 1A- TUNEL staining of kidney sections after AAI treatment for 3 d and quantification (n = 3).
Treatment AAI(10mg/kg)	0d	3d
Apoptosis %	0.028918	2.64806
	0	3.70117
	0.021468	3.27232

## Sheet: Figure 2-figure supplement 1B
Figure 2-figure supplement 1B- Caspase-3 activity in kidney tissues quantified after AAI treatment for 3 d (n = 3).
Treatment AAI(10mg/kg)	0d	3d
Caspase-3 activity (U/mg prot)	57.9103	70.2109
	56.6834	72.3566
	58.2024	75.9827

## Sheet: Figure 2-figure supplement 1C
Figure 2-figure supplement 1C-Protein levels of cleaved caspase-3 assessed by western blotting after AAI treatment for 3 d (n = 6).
Treatment AAI(10mg/kg)	0d	3d
Ratio (CL-caspase-3/β-actin)	1.008	8.796
	0.74	9.693
	1.17	10.151
	2.241	9.341
	1.868	7.236
	2.519	9.612

## Sheet: Figure 2-figure supplement 1D
Figure 2-figure supplement 1D- Immunohistochemical (IHC) analysis and quantification of cleaved caspase-3 in kidney tissues after AAI treatment for 3 d (n = 6).
Treatment AAI(10mg/kg)	0d	3d
Positive area(%)	1.008	8.796
	0.74	9.693
	1.17	10.151
	2.241	9.341
	1.868	7.236
	2.519	9.612

## Sheet: Figure 2-figure supplement 1E
Figure 2-figure supplement 1E-TUNEL staining of kidney sections from PSTPIP2Flox/Flox (FF) and PSTPIP2-cKI mice treated with AAI and quantification (n = 3).
treatment	Vehicle		AAI(3d)
	FF	PSTPIP2-cKI	FF	PSTPIP2-cKI
Apoptosis %	0.0247097	0.0287936	5.36547	1.16784
	0	0	9.14373	1.99264
	0	0	5.78814	1.69753

## Sheet: Figure 2-figure supplement 1F
Figure 2-figure supplement 1F-Quantification of caspase-3 activity in kidney tissues from FF and PSTPIP2-cKI mice treated with AAI (n = 4).
treatment	Vehicle		AAI(3d)
	FF	PSTPIP2-cKI	FF	PSTPIP2-cKI
Caspase-3 activity (U/mg prot)	53.5868	50.0036	62.5628	41.5213
	50.1414	52.9164	66.9854	32.6736
	49.536	46.6523	68.6688	45.4902
	52.2037	41.3777	58.5903	40.7539

## Sheet: Figure 2-figure supplement 1G
Figure 2-figure supplement 1G-Protein level of cleaved caspase-3 assessed by western blotting (n = 6).
treatment	Vehicle		AAI(3d)
	FF	PSTPIP2-cKI	FF	PSTPIP2-cKI
Ratio (CL-caspase-3/β-actin)	1.29179	1.83369	6.3086	4.65266
	0.909548	2.95835	6.72808	6.21252
	1.01859	1.36351	5.67972	5.26339
	0.888033	1.96519	6.57556	4.92803
	1.11296	1.2411	7.30872	5.6357
	0.779077	1.89479	7.67634	6.91763

## Sheet: Figure 2-figure supplement 1H
Figure 2-figure supplement 1H-IHC analysis and quantification of cleaved caspase-3 in kidney tissues from FF and PSTPIP2-cKI mice treated with AAI (n = 6).
treatment	Vehicle		AAI(3d)
	FF	PSTPIP2-cKI	FF	PSTPIP2-cKI
Positive area (%)	1.46	1.517	10.496	7.17
	2.281	2.178	11.987	5.564
	1.746	2.184	12.877	8.231
	1.806	2.304	11.359	6.29
	1.363	1.376	8.744	5.91
	1.893	1.86	13.519	4.974
