# Supplementary material for: PSTPIP2 ameliorates aristolochic acid nephropathy by suppressing interleukin-19-mediated neutrophil extracellular trap formation
Source: eLife journal article supplement (doi:10.7554/elife.89740), 2024-02-05
Supplement: fig3-data1 [file elife-89740-fig3-data1-v2.zip]

## Sheet: Figure 3C
FIG 3C-Real-time PCR analysis of PSTPIP2 in kidney tissues (n = 6 per group).
Group	PSTPIP2-cKI +AAI	PSTPIP2-cKI +SI+AAI
Relative PSTPIP2 mRNA expression	0.906733	0.503042
	0.828601	0.531724
	0.958433	0.565951
	1.1477	0.654629
	1.20476	0.767772
	1.1319	0.783905

## Sheet: Figure 3E
FIG 3E-Western blotting analyses of PSTPIP2 (n = 6 per group). PSTPIP2 levels were successfully restored in PSTPIP2-cKI mice.
Group	PSTPIP2-cKI +AAI	PSTPIP2-cKI +SI+AAI
Ratio (PSTPIP2/β-actin)	0.931866	0.102367
	1.12077	0.185987
	0.858681	0.232481
	1.09831	0.303689
	1.04105	0.493842
	0.949321	0.21343

## Sheet: Figure 3F
FIG 3F-Serum creatinine (Cr) assay. Serum Cr levels showed that silencing PSTPIP2 can aggravate kidney damage in PSTPIP2-cKI mice treated with AAI (n = 6 per group).
Group	FF+AAI	PSTPIP2-cKI +AAI	PSTPIP2-cKI +SI+AAI
Cr(μmol/L)	43.1777	29.0707	48.7177
	97.0926	26.729	95.7219
	44.3199	18.0478	30.3272
	70.1352	18.6189	62.9389
	46.7187	26.7861	62.8247
	75.7323	26.1579	43.1777

## Sheet: Figure 3G
FIG 3G-Serum blood urea nitrogen (BUN) assay. Serum BUN levels showed that silencing PSTPIP2 can aggravate kidney damage in PSTPIP2-cKI mice treated with AAI (n = 6 per group).
Group	FF+AAI	PSTPIP2-cKI +AAI	PSTPIP2-cKI +SI+AAI
BUN(mmol/L)	10.3268	10.0654	10.9804
	13.8562	9.01961	23.3987
	12.9412	9.41176	12.9412
	12.1569	8.62745	20
	10.5882	10.1961	11.8954
	16.6013	9.41176	12.9412

## Sheet: Figure 3I
FIG 3I-Western blotting analysis of KIM-1. Quantification of the KIM-1/β-actin ratio (n = 6).
Group	FF+AAI	PSTPIP2-cKI +AAI	PSTPIP2-cKI +SI+AAI
Ratio (KIM-1/β-actin)	1.18742	0.698883	0.674753
	1.02899	0.493249	1.08796
	1.05442	0.514819	0.803936
	0.903128	0.570474	0.965792
	0.89686	0.627856	0.691706
	0.929176	0.395346	0.814079

## Sheet: Figure 3J
FIG 3J-Immunohistochemistry (IHC) and kidney injury molecule-1 (KIM-1) levels in kidney tissues (n = 6 per group).
Group	FF+AAI	PSTPIP2-cKI +AAI	PSTPIP2-cKI +SI+AAI
Postive area (%)	5.872	2.223	5.148
	6.895	1.789	4.629
	8.341	1.037	5.781
	7.426	0.858	6.291
	3.807	0.728	5.421
	4.553	1.013	4.832
						J

## Sheet: Figure 3K
FIG 3K-TUNEL staining and analysis of kidney sections (n = 6 per group). Scale bar, 50 μm. The results showed that silencing PSTPIP2 can aggravate renal apoptosis in PSTPIP2-cKI mice treated with AAI.
Group	FF+AAI	PSTPIP2-cKI +AAI	PSTPIP2-cKI +SI+AAI
Apoptosis (%)	7.38358	0.231817	6.52174
	8.61838	0.251256	6.57698
	8.97781	0.618113	8.66667
	7.46469	0.258314	7.44936
	5.48282	0.720288	4.03476
	7.22045	0.560617	5.02827

## Sheet: Figure 3L
FIG 3L-Detection of caspase-3 activity in kidney tissues (n = 6 per group).
Group	FF+AAI	PSTPIP2-cKI +AAI	PSTPIP2-cKI +SI+AAI
Caspase-3 activity(U/mg prot)	52.4435	37.3689	48.6217
	53.8825	40.701	42.8791
	51.3822	38.4863	44.8301
	35.3528	36.0125	41.7267
	56.2047	32.047	41.5607
	47.7433	34.8175	60.4153

## Sheet: Figure 3M
FIG 3M-Western blot analysis of cleaved caspase-3. Quantification of the cleaved caspase-3/β-actin ratio (n = 6).
Group	FF+AAI	PSTPIP2-cKI +AAI	PSTPIP2-cKI +SI+AAI
Ratio(CL-caspase-3/β-actin)	1.3019	0.454532	0.892175
	1.08241	0.385812	0.806988
	0.798482	0.241737	0.902229
	0.959332	0.294607	0.919085
	0.914592	0.541909	0.799346
	0.94329	0.464392	0.88748

## Sheet: Figure 3N
FIG 3N-IHC and cleaved caspase-3 levels in kidney tissues. (n = 6 per group).
Group	FF+AAI	PSTPIP2-cKI +AAI	PSTPIP2-cKI +SI+AAI
Postive area (%)	12.806	2.592	5.802
	16.012	2.766	12.179
	14.767	2.761	14.736
	14.894	3.329	13.622
	8.961	1.259	6.714
	8.215	2.534	11.479
