# Supplementary material for: PSTPIP2 ameliorates aristolochic acid nephropathy by suppressing interleukin-19-mediated neutrophil extracellular trap formation
Source: eLife journal article supplement (doi:10.7554/elife.89740), 2024-02-05
Supplement: fig4-data1 [file Figure4-source data1.xlsx]

## Sheet: Figure 4A
FIG 4A-Representative images of immunohistochemistry (IHC) staining with Ly6G+. Quantification of the percentage of Ly6G+ neutrophil infiltration. n = 6.
Treatment AAI(10mg/kg)	0d	3d
Ly6G+ cells(%)	0.0468823	8.68263
	0	5.84615
	0	5.37715
	0.052356	6.04411
	0.061237	5.76998
	0	5.35791

## Sheet: Figure 4B
FIG 4B-mRNA level of renal tissue monocyte chemoattractant protein-1 (MCP-1) assessed by real-time PCR (n = 6 per group).
Treatment AAI(10mg/kg)	0d	3d
Relative MCP-1 mRNA expression	0.613868	16.291
	1.33422	15.6273
	1.1065	33.2665
	1.44995	21.4961
	0.761017	11.4452
	0.686184	20.6299

## Sheet: Figure 4C
FIG 4C-mRNA level of renal tissue tumor necrosis factor-α (TNF-α) assessed by real-time PCR (n = 6 per group).
Treatment AAI(10mg/kg)	0d	3d
Relative TNF-α mRNA expression	0.852635	4.50023
	0.993093	4.59479
	0.920188	3.01049
	1.25701	2.58471
	0.920188	2.42279
	1.10957	1.87471

## Sheet: Figure 4D
FIG 4D-Protein level of renal tissue MCP-1 assessed by ELISA (n = 6 per group).
Treatment AAI(10mg/kg)	0d	3d
MCP-1 level (pg/ml)	418.761	564.559
	409.871	574.042
	472.694	559.225
	489.882	584.71
	469.138	526.035
	483.362	584.71

## Sheet: Figure 4E
FIG 4E-Protein level of renal tissue TNF-α assessed by ELISA (n = 6 per group).
Treatment AAI(10mg/kg)	0d	3d
TNF-α level (pg/ml)	730.804	863.033
	695.723	814.459
	687.627	800.966
	711.914	736.201
	660.642	890.019
	722.708	760.488

## Sheet: Figure 4F
FIG 4F-Representative IHC staining images of kidney sections, showing the expression of Ly6G. Kidneys were isolated from PSTPIP2Flox/Flox and PSTPIP2-cKI mice on day 3 after AAI treatment. Quantification of the percentage of Ly6G+ neutrophil infiltration (n = 6 per group).
treatment	Vehicle		AAI(3d)
	FF	PSTPIP2-cKI	FF	PSTPIP2-cKI
Ly6G+ cells(%)	0	0.0706964	7.62887	0.808961
	0	0	9.04449	0.463499
	0	0.121729	4.09193	0.874636
	0	0.0374532	4.10079	0.584795
	0.0491642	0.0423191	7.61905	0.369198
	0.138696	0	6.03774	0.378174

## Sheet: Figure 4G
FIG 4G- Relative mRNA levels of MCP-1 in renal tissue determined by real-time PCR (n = 4 per group).
treatment	Vehicle		AAI(3d)
	FF	PSTPIP2-cKI	FF	PSTPIP2-cKI
Relative MCP-1 mRNA expression	0.765779	0.827406	9.04215	2.00926
	1.03288	1.0693	6.66529	2.30804
	1.06191	1.36289	12.966	2.42279
	0.911722	0.899171	10.0329	3.42634

## Sheet: Figure 4H
FIG 4H- Relative mRNA levels of TNF-α in renal tissue determined by real-time PCR (n = 4 per group).
treatment	Vehicle		AAI(3d)
	FF	PSTPIP2-cKI	FF	PSTPIP2-cKI
Relative TNF-α mRNA expression	1.02456	1.58557	4.90754	2.13613
	0.942785	1.52098	4.5789	1.72309
	1.22689	1.56374	2.61172	2.41999
	1.45902	0.855595	2.57576	2.32141

## Sheet: Figure 4I
FIG 4I-Protein level of renal tissue MCP-1 assessed by ELISA (n = 6 per group).
treatment	Vehicle		AAI(3d)
	FF	PSTPIP2-cKI	FF	PSTPIP2-cKI
MCP-1 level (pg/ml)	386.33	345.435	510.791	350.769
	364.993	395.22	475.231	396.998
	340.101	331.211	423.668	366.771
	297.428	300.984	452.117	363.215
	336.545	324.099	379.218	350.769
	357.881	297.428	430.78	331.211

## Sheet: Figure 4J
FIG 4J-Protein level of renal tissue TNF-α assessed by ELISA (n = 6 per group).
treatment	Vehicle		AAI(3d)
	FF	PSTPIP2-cKI	FF	PSTPIP2-cKI
TNF-α level (pg/ml)	809.062	876.526	1076.22	881.923
	892.717	914.305	1051.93	952.085
	838.746	876.526	962.879	962.879
	763.187	849.54	957.482	876.526
	782.077	884.621	943.99	846.842
	833.349	873.827	933.195	927.798

[truncated: 5 more sheets: Figure 4K, Figure 4L, Figure 4M, Figure 4N, Figure 4O]
