# Supplementary material for: PSTPIP2 ameliorates aristolochic acid nephropathy by suppressing interleukin-19-mediated neutrophil extracellular trap formation
Source: eLife journal article supplement (doi:10.7554/elife.89740), 2024-02-05
Supplement: fig4-figsupp1-data1 [file elife-89740-fig4-figsupp1-data1-v2.zip]

## Sheet: Figure 4-figure supplement 1B
Figure 4-figure supplement 1B-Flow cytometry was used to evaluate Ly6G+ neutrophil infiltration in the blood (n = 4 per group).
Group	Vehicle	AAI(10mg/kg)	AAI(10mg/kg)+Anti-Ly6G	AAI(10mg/kg)+Anti-IgG2a
%of neutrophils in mouse blood	5.75	26.8	1.71	13.8
	5.1	23.4	2.59	17.6
	5.66	11.2	4.59	17.3
	6.03	11.9	3.32	18.7

## Sheet: Figure 4-figure supplement 1C
Figure 4-figure supplement 1C-Flow cytometry was used to evaluate Ly6G+ neutrophil infiltration in the mouse kideny. (n = 4 per group).
Group	Vehicle	AAI(10mg/kg)	AAI(10mg/kg)+Anti-Ly6G	AAI(10mg/kg)+Anti-IgG2a
%of neutrophils in mouse kidney	10.2	21.6	14.7	22.4
	11.9	23.7	16.1	27.9
	9.58	31.1	16.2	23.5
	14.3	25.7	16.9	23.8

## Sheet: Figure 4-figure supplement 1D
Figure 4-figure supplement 1D-Representative images of immunohistochemistry (IHC) staining of Ly6G. Quantification of the percentage of Ly6G+ neutrophil infiltration (n = 3 per group).
Group	Vehicle	AAI(10mg/kg)	AAI(10mg/kg)+Anti-Ly6G	AAI(10mg/kg)+Anti-IgG2a
Ly6G+ cells(%)	0.0730994	5.55144	0.044484	4.89182
	0	6.80851	0	6.28019
	0	5.14403	0	3.33876
