# Supplementary material for: PSTPIP2 ameliorates aristolochic acid nephropathy by suppressing interleukin-19-mediated neutrophil extracellular trap formation
Source: eLife journal article supplement (doi:10.7554/elife.89740), 2024-02-05
Supplement: fig4-figsupp2-data1 [file elife-89740-fig4-figsupp2-data1-v2.zip]

## Sheet: Figure 4-figure supplement 2A
Figure 4-figure supplement 2A-Serum creatinine (Cr) assay of mice pretreated with anti-mouse Ly6G or IgG control antibody, followed by AAI treatment (n = 6 per group).
Group	Vehicle	AAI(10mg/kg)	AAI(10mg/kg)+Anti-Ly6G	AAI(10mg/kg)+Anti-IgG2a
Cr (μmol/L)	18.904	33.6728	22.6848	37.2173
	19.9674	28.8287	26.3475	33.5547
	14.6506	36.0358	27.1745	33.6728
	16.6592	40.7618	26.3475	26.3475
	16.3047	31.0735	21.6215	33.6728
	13.7054	35.9177	17.9588	30.0102

## Sheet: Figure 4-figure supplement 2B
Figure 4-figure supplement 2B-Serum blood urea nitrogen (BUN) assay of mice pretreated with anti-mouse Ly6G or IgG control antibody, followed by AAI treatment (n = 6 per group).
Group	Vehicle	AAI(10mg/kg)	AAI(10mg/kg)+Anti-Ly6G	AAI(10mg/kg)+Anti-IgG2a
BUN (mmol/L)	6.20778	16.8172	12.3385	14.174
	7.27239	18.1021	10.0991	14.8348
	7.78634	16.3767	8.77753	12.779
	6.46476	16.5235	9.21806	16.3767
	7.16226	18.4692	11.8979	17.1843
	7.74963	17.1843	9.98899	17.6615

## Sheet: Figure 4-figure supplement 2D
Figure 4-figure supplement 2D-Immunohistochemistry (IHC) staining and quantification of kidney injury molecule-1 (KIM-1) in kidney tissues (n = 6 per group).
Group	Vehicle	AAI(10mg/kg)	AAI(10mg/kg)+Anti-Ly6G	AAI(10mg/kg)+Anti-IgG2a
Positive area (%)	0.214	8.753	1.377	6.235
	0.293	7.032	2.74	7.929
	0.744	9.192	1.409	10.654
	0.283	7.889	1.491	9.007
	0.456	7.624	1.797	10.916
	0.506	9.62	3.181	7.554

## Sheet: Figure 4-figure supplement 2E
Figure 4-figure supplement 2E-TUNEL staining and quantification in kidney sections (n = 3 per group).
Group	Vehicle	AAI(10mg/kg)	AAI(10mg/kg)+Anti-Ly6G	AAI(10mg/kg)+Anti-IgG2a
Apoptosis %	0.157035	3.68469	1.62549	3.23873
	0.029377	4.69732	0.618769	3.3411
	0	3.06158	1.16316	3.9745

## Sheet: Figure 4-figure supplement 2F
Figure 4-figure supplement 2F-IHC staining and quantification of cleaved caspase-3 in kidney tissues. (n = 6 per group).
Group	Vehicle	AAI(10mg/kg)	AAI(10mg/kg)+Anti-Ly6G	AAI(10mg/kg)+Anti-IgG2a
Positive area (%)	1.501	10.142	5.28	14.729
	1.945	13.191	5.019	13.352
	1.785	12.145	8.453	12.048
	1.053	14.353	3.423	9.811
	1.744	13.676	4.041	11.435
	1.355	16.705	3.698	13.262

## Sheet: Figure 4-figure supplement 2G
Figure 4-figure supplement 2G-Detection of caspase-3 activity in kidney tissues (n = 4 per group).
Group	Vehicle	AAI(10mg/kg)	AAI(10mg/kg)+Anti-Ly6G	AAI(10mg/kg)+Anti-IgG2a
Caspase-3 activity (U/mg prot)	38.8082	72.7396	57.9103	76.6966
	44.2804	76.399	56.6834	73.1157
	49.302	82.2685	58.2024	75.9827
	50.5719	79.9317	66.3729	74.0287
