# Supplementary material for: PSTPIP2 ameliorates aristolochic acid nephropathy by suppressing interleukin-19-mediated neutrophil extracellular trap formation
Source: eLife journal article supplement (doi:10.7554/elife.89740), 2024-02-05
Supplement: fig5-figsupp1-data1 [file elife-89740-fig5-figsupp1-data1-v2.zip]

## Sheet: Figure 5-figure supplement 1A
Figure 5-figure supplement 1A-Serum nucleosome level (n = 6 per group).
Group	FF+AAI	PSTPIP2-cKI +AAI	PSTPIP2-cKI +SI+AAI
Fold increase vs.(PSTPIP2-cKI+AAI)	1.00943	0.660377	2.01887
	0.981132	0.707547	1.72642
	0.90566	0.688679	0.924528
	1.16038	0.839623	1.12264
	0.90566	0.896226	1.46226
	1.03774	0.990566	2.29245

## Sheet: Figure 5-figure supplement 1B
Figure 5-figure supplement 1B-Serum myeloperoxidase (MPO) level (n = 6 per group).
Group	FF+AAI	PSTPIP2-cKI +AAI	PSTPIP2-cKI +SI+AAI
Serum MPO level(pg/mL)	1309.11	1040.23	1195.46
	1273.08	1051.32	1156.65
	1375.64	1101.21	1173.29
	1322.97	1095.67	1212.09
	1300.8	1162.2	1300.8
	1359.01	1223.18	1284.16

## Sheet: Figure 5-figure supplement 1C
Figure 5-figure supplement 1C-Serum dsDNA level (n = 6 per group).
Group	FF+AAI	PSTPIP2-cKI +AAI	PSTPIP2-cKI +SI+AAI
dsDNA(ng/mL)	1892.33	892.558	1701.98
	1733.4	990.502	1916.35
	1227.05	1326.84	1829.49
	2224.97	813.094	2509.56
	1772.21	866.686	1142.04
	1992.12	1049.64	940.606

## Sheet: Figure 5-figure supplement 1D
Figure 5-figure supplement 1D-Protein level of citrullinated histone 3 (Cit-H3) assessed by western blotting (n = 6 per group).
Group	FF+AAI	PSTPIP2-cKI +AAI	PSTPIP2-cKI +SI+AAI
Ratio (Cit-H3/β-actin)	1.21226	0.35159	0.687285
	1.14162	0.308302	0.614919
	1.1937	0.374005	0.740094
	0.755569	0.565548	0.840626
	1.03331	0.461219	1.04799
	0.663545	0.746074	0.879158
