# Supplementary material for: PSTPIP2 ameliorates aristolochic acid nephropathy by suppressing interleukin-19-mediated neutrophil extracellular trap formation
Source: eLife journal article supplement (doi:10.7554/elife.89740), 2024-02-05
Supplement: fig5-figsupp2-data1 [file elife-89740-fig5-figsupp2-data1-v2.zip]

## Sheet: Figure 5-figure supplement 2B
Figure 5-figure supplement 2B-Serum nucleosome level assessed after treatment with AAI and co-treatment with GSK484 or DNase I (n = 6 per group).
Group	Vehicle	AAI(10mg/kg)	AAI(10mg/kg)+GSK484	AAI(10mg/kg)+DNase I
Fold increase vs.Vehicle	0.825328	1.5262	1.26419	0.884279
	0.956332	1.84716	1.10699	0.949782
	0.766376	1.69651	1.24454	0.89083
	0.975983	1.97162	1.19869	1.04803
	1.4869	1.41485	1.02183	0.89738
	0.989083	2.01747	1.31004	0.949782

## Sheet: Figure 5-figure supplement 2C
Figure 5-figure supplement 2C-Serum myeloperoxidase (MPO) level assessed after treatment with AAI and co-treatment with GSK484 or DNase I (n = 6 per group).
Group	Vehicle	AAI(10mg/kg)	AAI(10mg/kg)+GSK484	AAI(10mg/kg)+DNase I
serum MPO level(pg/mL)	1267.74	1387.08	1321.24	1259.51
	1218.36	1440.58	1255.39	1333.58
	1152.51	1457.04	1300.66	1284.2
	1173.09	1448.81	1292.43	1300.66
	1185.43	1411.77	1173.09	1350.04
	1263.62	1382.97	1189.55	1296.55

## Sheet: Figure 5-figure supplement 2D
Figure 5-figure supplement 2D-Serum dsDNA level assessed after treatment with AAI and co-treatment with GSK484 or DNase I (n = 6 per group).
Group	Vehicle	AAI(10mg/kg)	AAI(10mg/kg)+GSK484	AAI(10mg/kg)+DNase I
dsDNA level(ng/mL)	1210.07	1581.15	1349.41	1239.08
	1313.56	1631.04	1391.17	1351.81
	1394.87	1674.29	1205.82	1201.2
	1255.71	1638.62	1265.51	1228.73
	1342.57	1614.78	1332.41	1307.27
	1337.58	1589.46	1299.14	1411.5

## Sheet: Figure 5-figure supplement 2E
Figure 5-figure supplement 2E-Protein level of citrullinated histone 3 (Cit-H3) assessed by western blotting (n = 6 per group).
Group	Vehicle	AAI(10mg/kg)	AAI(10mg/kg)+GSK484	AAI(10mg/kg)+DNase I
Ratio (Cit-H3/β-actin)	0.663108	1.91687	1.78325	1.05296
	1.3554	2.07775	1.49175	0.614784
	0.919209	1.79055	1.33295	1.06997
	1.36869	1.52897	1.22098	1.45498
	0.37017	1.8047	1.34221	0.699911
	1.32342	1.98154	1.22609	0.470178
