# Supplementary material for: PSTPIP2 ameliorates aristolochic acid nephropathy by suppressing interleukin-19-mediated neutrophil extracellular trap formation
Source: eLife journal article supplement (doi:10.7554/elife.89740), 2024-02-05
Supplement: fig5-figsupp3-data1 [file elife-89740-fig5-figsupp3-data1-v2.zip]

## Sheet: Figure 5-figure supplement 3A
Figure 5-figure supplement 3A-Serum creatinine (Cr) assay performed on AAI-treated mice co-treated with GSK484 or DNase I (n = 6 per group).
Group	Vehicle	AAI(10mg/kg)	AAI(10mg/kg)+GSK484	AAI(10mg/kg)+DNase I
Cr(μmol/L)	7.36379	74.3754	47.5938	60.2471
	10.0834	89.2643	39.527	89.1145
	17.5164	108.302	58.991	58.4378
	15.9145	88.4346	36.4502	37.8561
	11.8466	89.1375	62.4827	43.8716
	8.35484	72.6468	32.8662	47.7551

## Sheet: Figure 5-figure supplement 3B
Figure 5-figure supplement 3B-Serum blood urea nitrogen (BUN) assay performed on AAI-treated mice co-treated with GSK484 or DNase I (n = 6 per group).
Group	Vehicle	AAI(10mg/kg)	AAI(10mg/kg)+GSK484	AAI(10mg/kg)+DNase I
BUN(mmol/L)	8.31404	15.4722	11.1022	12.9743
	9.02533	15.38	10.8438	9.70307
	8.20164	15.6148	9.67623	9.45143
	7.52391	16.5509	9.47828	11.0988
	8.86764	17.5726	11.5182	11.3672
	7.38802	12.8485	10.0403	13.642

## Sheet: Figure 5-figure supplement 3D
Figure 5-figure supplement 3D-KIM-1 staining of kidney sections of AAI-treated mice co-treated with GSK484 or DNase I (n = 6 per group). Positive staining areas were measured using Image-Pro Plus 6.0 (Media Cybernetics, Inc., Rockville, MD, USA).
Group	Vehicle	AAI(10mg/kg)	AAI(10mg/kg)+GSK484	AAI(10mg/kg)+DNase I
Positive area(%)	1.01	7.632	2.405	3.145
	0.681	7.857	3.414	3.415
	0.383	6.945	3.57	2.38
	0.307	4.641	4.041	1.878
	0.494	5.744	3.494	3.251
	0.396	5.261	2.547	3.633

## Sheet: Figure 5-figure supplement 3E
Figure 5-figure supplement 3E-TUNEL staining and quantification of kidney sections (n = 3 per group).
Group	Vehicle	AAI(10mg/kg)	AAI(10mg/kg)+GSK484	AAI(10mg/kg)+DNase I
Apoptosis %	0.157035	3.67041	1.13154	1.54605
	0.029377	4.27586	0.859107	2.32406
	0	4.2547	1.12994	1.63985

## Sheet: Figure 5-figure supplement 3F
Figure 5-figure supplement 3F-Activity of caspase-3 quantified after co-treatment with AAI and GSK484 or DNase I (n = 6 per group).
Group	Vehicle	AAI(10mg/kg)	AAI(10mg/kg)+GSK484	AAI(10mg/kg)+DNase I
Caspase-3 activity (U/mg prot)	51.6634	54.6262	44.2813	36.4403
	44.4549	56.7848	45.0754	37.2078
	41.7142	52.8359	45.0628	45.1396
	41.7728	49.403	45.6454	47.0065
	35.0452	58.1391	45.6928	50.5998
	36.1714	62.5417	46.0233	48.8146

## Sheet: Figure 5-figure supplement 3G
Figure 5-figure supplement 3G-Cleaved-caspase-3 staining and quantification in kidney sections of AAI-treated mice co-treated with GSK484 or DNase I (n = 6 per group).
Group	Vehicle	AAI(10mg/kg)	AAI(10mg/kg)+GSK484	AAI(10mg/kg)+DNase I
Positive area (%)	0.9	8.201	3.974	3.425
	1.278	7.893	3.877	2.391
	1.112	8.542	2.605	4.179
	0.826	9.024	3.277	2.776
	0.991	10.879	4.717	3.232
	1.026	8.653	3.366	2.551
