# Supplementary material for: PSTPIP2 ameliorates aristolochic acid nephropathy by suppressing interleukin-19-mediated neutrophil extracellular trap formation
Source: eLife journal article supplement (doi:10.7554/elife.89740), 2024-02-05
Supplement: fig5-figsupp4-data1 [file elife-89740-fig5-figsupp4-data1-v2.zip]

## Sheet: Figure 5-figure supplement 4B
Figure 5-figure supplement 4B-Level of neutrophil elastase assessed after treating mRTECs with different CMs (n = 3).
Group	Vehicle	AAI(10mg/kg)	AAI(10mg/kg)+Dnase I
Neutrophil Elastase (mU/ml)	0.557718	0.747008	0.647856
	0.620814	0.683911	0.629828
	0.602787	0.692925	0.620814

## Sheet: Figure 5-figure supplement 4C
Figure 5-figure supplement 4C-Level of dsDNA assessed after treating mRTECs with different CMs (n = 3).
Group	Vehicle	AAI(10mg/kg)	AAI(10mg/kg)+Dnase I
dsDNA(ng/mL)	1238.07	2222.77	1428.96
	1242.13	2236.26	1437.46
	1271.88	2234.32	1419.35

## Sheet: Figure 5-figure supplement 4E
Figure 5-figure supplement 4E-Level of Cit-H3 assessed by western blotting after treatment with different CMs (n = 3).
Group	Vehicle	AAI(10mg/kg)	AAI(10mg/kg)+Dnase I
Ratio (Cit-H3/β-actin)	0.680372	13.3659	9.10282
	0.571974	14.1572	4.28985
	1.74765	9.91055	7.39984

## Sheet: Figure 5-figure supplement 4H
Figure 5-figure supplement 4H-Apoptosis in mRTECs cultured with different CMs detected using flow cytometry . Quantity of apoptotic mRTECs cultured with different CMs (n = 3).
Group	Vehicle	AAI(40μM)	NETs orgine: AAI(10mg/kg)	AAI(40μM) +NETs orgine: AAI(10mg/kg)	AAI(40μM) +NETs orgine: AAI(10mg/kg)+Dnase I
Apoptosis cells(%)	5.34	4.77	7.11	19.02	12.96
	5	4.66	9.97	21.83	10.12
	4.21	9.07	8.11	20.08	13.33

## Sheet: Figure 5-figure supplement 4I
Figure 5-figure supplement 4I-Activity of caspase-3 quantified after treating mRTECs with different CMs (n = 3).
Group	Vehicle	AAI(40μM)	NETs orgine: AAI(10mg/kg)	AAI(40μM) +NETs orgine: AAI(10mg/kg)	AAI(40μM) +NETs orgine: AAI(10mg/kg)+Dnase I
Caspase-3 activity (U/mg prot)	19.4159	20.4997	17.1947	25.4257	20.5561
	15.0143	17.6407	18.6237	24.5839	21.7156
	18.5672	22.1336	17.9892	28.7356	21.81

## Sheet: Figure 5-figure supplement 4J
Figure 5-figure supplement 4J-Protein levels of cleaved caspase-3 assessed by western blotting after treatment with different CMs (n = 3).
Group	Vehicle	AAI(40μM)	NETs orgine: AAI(10mg/kg)	AAI(40μM) +NETs orgine: AAI(10mg/kg)	AAI(40μM) +NETs orgine: AAI(10mg/kg)+Dnase I
Ratio (CL-caspase-3/β-actin)	0.68514	0.8776	2.95159	5.53747	3.99348
	1.51052	1.03198	3.54245	5.04282	3.2401
	0.804335	0.891942	3.79946	5.06811	3.29547
