# Supplementary material for: PSTPIP2 ameliorates aristolochic acid nephropathy by suppressing interleukin-19-mediated neutrophil extracellular trap formation
Source: eLife journal article supplement (doi:10.7554/elife.89740), 2024-02-05
Supplement: fig6-data1 [file elife-89740-fig6-data1-v2.zip]

## Sheet: Figure 6B
FIG 6B-mRNA levels of various interleukins in mRTECs assessed by real-time PCR (n = 3).
Treatment		Vehicle			AAI(40μM)				Treatment		pEGFP-C1 +AAI (40μM)			pEGFP-C1/PSTPIP2 +AAI (40μM)
interleukins									interleukins
Relative mRNA expression	IL1α	0.843816	1.09809	1.01748	0.604997	0.72951	0.657471		Relative mRNA expression	IL1α	1.05702	0.888843	0.90125	1.04972	0.986233	1.03526
	IL1β	0.795536	1.09429	0.993093	1.1487	1.37554	1.10957			IL1β	1.00812	1.09556	1.09556	1.11085	1.07301	1.2072
	IL3	0.780516	1.18304	0.808041	2.66198	1.98963	2.13243			IL3	0.99424	0.927659	0.836053	1.0293	0.859558	0.89606
	IL4	1.11471	0.850669	0.918066	2.30804	2.8613	2.06576			IL4	0.909093	0.825019	1.03706	1.33099	1.3218	1.42652
	IL5	0.935191	1.19196	0.897095	44.735	45.9927	50.6796			IL5	1.05214	0.915945	1.2086	0.988514	1.19196	1.26868
	IL6	1.09177	1.07674	0.850667	0.80478	1.21982	1.78592			IL6	1.07923	0.939523	1.07177	2	2.42839	2.60268
	IL7	0.86304	1.1	1.10765	0.388908	0.440587	0.449845			IL7	1.04608	0.91067	0.96929	1.01748	1.22688	1.1607
	IL9	0.958154	0.97153	0.906469	3.80614	4.37211	3.47817			IL9	1.17148	1.116	0.951538	1.45229	1.31798	1.29086
	IL10	1.04608	1.03886	0.989657	4.54727	6.34227	3.79737			IL10	1.0693	1.09177	0.918064	1.24545	1.71317	1.70133
	IL11	1.03049	1.09682	1.00928	18.0425	22.6797	19.472			IL11	1.21419	1.06437	1.21419	1.09429	0.97942	1.1487
	IL12α	0.855595	1.05336	1.04608	2.5403	3.39874	2.62988			IL12α	1.29594	0.704172	1.32317	2.13465	2.1495	2.79723
	IL13	1.217	0.608502	1.35035	5.51489	4.801	3.21169			IL13	1.20025	0.819794	1.0163	2.20891	2.6087	1.76949
	IL14	0.820742	0.955945	1.07549	1.20999	1.73508	1.83401			IL14	1.10829	1.01279	1.06314	0.912776	1.116	1.07798
	IL15	1.15803	1.14209	1.05093	0.559291	0.587097	0.583041			IL15	1.08423	1.05458	1.18647	1.0693	1.24545	1.47087
	IL16	0.946058	1.24833	0.773783	3.94493	2.08493	3.16017			IL16	0.994243	1.29385	0.688568	1.17419	1.70724	1.31191
	IL17A	1.2812	0.998269	1.27235	1.66728	1.47172	1.51309			IL17A	0.866537	1.18372	0.974905	1.07425	1.68568	1.18372
	IL17E	1.18646	0.799221	1.05458	15.4193	18.4643	18.2101			IL17E	1.10318	1.02219	1.17419	0.818849	0.994243	1.18236
	IL17F	0.920188	1.08674	0.806642	16.4498	17.5087	12.5534			IL17F	1.03168	0.879649	0.843816	1.13682	1.13682	1.12117
	IL18	1.10957	0.939523	1.06437	1.42405	1.53687	2.04202			IL18	1.1355	0.884743	0.848702	1.06683	1.05214	1.20859
	IL19	0.775572	0.981686	1.31343	45.0462	59.0282	51.7445			IL19	1.07923	1.11729	1.07923	0.632878	0.659754	0.752623
	IL20	0.73884	0.825496	0.878633	1.40769	1.7818	2.38392			IL20	1.11858	1.00812	0.934111	0.980552	1.34879	1.36762
	IL21	0.909093	1.43644	1.23328	2.30138	2.4158	3.63637			IL21	0.805245	0.984525	0.977725	1.23756	0.984525	0.924984
	IL22	0.791137	0.927874	1.05117	3.8691	5.47174	3.34498			IL22	0.948246	1.05214	1.00231	1.04488	1.29534	1.20025
	IL23	1.02101	1.08674	1.1019	0.632878	0.795536	0.323088			IL23	0.942785	0.962594	0.96929	0.78187	0.724471	0.898132
	IL24	1.02633	1.03347	0.998269	0.618781	0.725728	0.618781			IL24	1.10957	0.933033	1.10191	0.61132	0.790041	0.895025
	IL25	1.08799	0.847724	0.921251	11.5648	13.1016	11.3268			IL25	1.07177	0.870551	1.07177	1.19748	1.12506	1.03526
	IL27	0.855595	1.02456	1.31494	2.91804	2.79917	2.52276			IL27	1.17963	1.02693	0.944965	0.589815	0.751754	1.00579
	IL28β	1.30586	1.03168	1.09809	3.23777	3.06312	3.37526			IL28β	0.771105	1.22688	0.750019	3.26029	3.56771	3.3058
	IL31	0.80571	1.13945	0.863539	3.99538	4.49504	3.15652			IL31	0.923382	1.17691	1.05336	0.436786	0.396392	0.424842
	IL33	0.875594	1.0558	1.07054	0.118942	0.149512	0.187939			IL33	0.934327	1.07326	1.02243	0.859756	0.883928	0.807761
	IL34	0.875593	0.978289	1.01983	0.208531	0.27137	0.212913			IL34	0.972655	1.02811	1.03526	0.823591	0.752623	0.726986
	IL40	0.854114	0.87206	1.09619	23.7936	14.8511	14.1477			IL40	1.00556	1.16312	1.1235	0.869345	0.691595	0.811127

## Sheet: Figure 6C
Fig 6C-Protein level of IL-19 in the cell culture supernatant assessed by ELISA (n = 3).
Treatment	Vehicle	AAI(40μM)
IL19(pg/ml)	160.907	225.491
	171.671	225.491
	181.089	261.82

## Sheet: Figure 6D
Fig 6D-mRNA level of IL-19 in mRTECs assessed after treatment with AAI by real-time PCR (n = 3).
Treatment	Vehicle	AAI(40μM)
Relative IL-19 mRNA expression	0.775572	45.0462
	0.981686	51.7445
	1.31343	59.0282

## Sheet: Figure 6F
Fig 6F-Correlation analysis of serum IL-19 and Cr levels in patients with kidney-related diseases (n = 27).
Cr level(μmol/L)	IL19 level(pg/ml)
198.428	274.481
144.058	97.7699
216.988	125.056
158.196	199.119
450.188	308.265
444.184	161.438
1225.23	340.748
129.538	199.119
160.762	231.603
1250.4	391.423
124.024	240.049
210.013	147.145
807.254	218.609
83.8521	226.406
82.1029	229.004
139.936	208.215
134.36	201.718
145.347	253.692
76.5273	262.787
92.5981	135.451
754.341	225.106
456.868	391.423
128.785	266.685
107.357	283.577
174.373	442.098
1229.03	468.085
186.945	188.724
Y =0.1365*X + 201.7
R=0.5472

## Sheet: Figure 6G
FIG 6G-Serum levels of IL-19 protein in PSTPIP2Flox/Flox and PSTPIP2-cKI mice treated with AAI (n = 6).
treatment	Vehicle		AAI(3d)
	FF	PSTPIP2-cKI	FF	PSTPIP2-cKI
IL19(pg/ml)	180.417	188.49	229.528	200.936
	201.945	205.309	224.818	205.309
	190.844	201.945	241.973	205.981
	201.945	208	242.982	228.182
	198.581	210.018	230.537	216.745
	203.29	214.727	260.138	224.818

## Sheet: Figure 6H
FIG 6H-Serum levels of IL-19 protein in PSTPIP2Flox/Flox, PSTPIP2-cKI, and PSTPIP2-cKI-silenced mice on day 3 after AAI treatment (n = 6).
Group	FF+AAI	PSTPIP2-cKI +AAI	PSTPIP2-cKI +SI+AAI
IL19(pg/ml)	250.742	221.141	229.214
	261.506	196.922	239.978
	221.141	231.905	249.397
	239.978	215.759	250.742
	234.596	229.214	253.433
	237.287	218.45	261.506

## Sheet: Figure 6I
FIG 6I-Relative mRNA levels of IL-19 in PSTPIP2Flox/Flox and PSTPIP2-cKI mice treated with AAI determined by real-time PCR (n = 5 per group).
treatment	Vehicle		AAI(3d)
	FF	PSTPIP2-cKI	FF	PSTPIP2-cKI
Relative IL-19 mRNA expression	1.02669	0.65884	28.4036	16.6563
	0.875391	1.21251	17.3637	12.711
	0.957935	0.59791	19.5351	9.97281
	1.11574	0.756808	20.9372	5.76772
	1.04102	0.682074	16.2009	7.50577

## Sheet: Figure 6J
FIG 6J-Real-time PCR analysis of IL-19 (n = 4 per group).
Group	FF+AAI	PSTPIP2-cKI +AAI	PSTPIP2-cKI +SI+AAI
Relative IL-19 mRNA expression	1.25266	0.545254	0.923382
	1.13682	0.643941	0.898132
	1.1607	0.530344	0.680657
	1.16878	0.724471	0.719467

## Sheet: Figure 6K
FIG 6K-Protein level of IL-19 in cell culture supernatant assessed by ELISA (n = 3).
Group	Vehicle	AAI(40μM)	pEGFP-C1+AAI(40μM)	pEGFP-C1/PSTPIP2+AAI(40μM)
IL19(pg/ml)	208.672	248.364	247.019	223.473
	212.036	261.147	257.11	226.837
	215.4	253.746	259.128	233.564

## Sheet: Figure 6L
FIG 6L-mRNA level of IL-19 in mRTECs assessed by real-time PCR (n = 3).
Group	Vehicle	AAI(40μM)	pEGFP-C1+AAI(40μM)	pEGFP-C1/PSTPIP2+AAI(40μM)
IL19(pg/ml)	208.672	248.364	247.019	223.473
	212.036	261.147	257.11	226.837
	215.4	253.746	259.128	233.564
