# Supplementary material for: PSTPIP2 ameliorates aristolochic acid nephropathy by suppressing interleukin-19-mediated neutrophil extracellular trap formation
Source: eLife journal article supplement (doi:10.7554/elife.89740), 2024-02-05
Supplement: fig6-figsupp1-data1 [file elife-89740-fig6-figsupp1-data1-v2.zip]

## Sheet: Figure 6-figure supplement 1D
Figure 6-figure supplement 1D-Verification of PSTPIP2 overexpression in mRTECs (n = 3).
Treatment	pEGFP-C1	pEGFP-C1/PSTPIP2
Relative PSTPIP2 mRNA expression	1.1487	104.691
	0.913831	88.0347
	1.06437	95.6704

## Sheet: Figure 6-figure supplement 1E
Figure 6-figure supplement 1E-Verification of PSTPIP2 overexpression in mRTECs (n = 3).
Treatment	pEGFP-C1	pEGFP-C1/PSTPIP2
Ratio （PSTPIP2/β-actin)	0.768862	2.10312
	0.85606	1.8062
	1.37508	2.29723
