# Supplementary material for: PSTPIP2 ameliorates aristolochic acid nephropathy by suppressing interleukin-19-mediated neutrophil extracellular trap formation
Source: eLife journal article supplement (doi:10.7554/elife.89740), 2024-02-05
Supplement: fig7-data1 [file elife-89740-fig7-data1-v2.zip]

## Sheet: Figure 7B
FIG 7B- Serum creatinine (Cr) assay. Serum Cr showed that In vivo administration of rIL-19 in mice exacerbated the progression of aristolochic acid nephropathy (n = 6 per group).
treatment	Vehicle		AAI(3d)
	Vehicle	IL-19	Vehicle	IL-19
Cr(μmol/L)	13.288	10.1908	50.1546	68.0884
	11.3397	11.7394	41.5124	61.9939
	11.7893	10.3406	58.7968	76.3309
	9.19168	10.2907	76.9803	59.5461
	15.8357	13.288	34.3189	66.0902
	11.7893	13.3379	42.5115	90.4681

## Sheet: Figure 7C
FIG 7C- Serum blood urea nitrogen (BUN) assay. Serum BUN showed that In vivo administration of rIL-19 in mice exacerbated the progression of aristolochic acid nephropathy (n = 6 per group).
treatment	Vehicle		AAI(3d)
	Vehicle	IL-19	Vehicle	IL-19
BUN(mmol/L)	10.119	12.2024	15.6548	17.5
	10	13.0357	16.1905	19.0476
	8.03571	11.7857	17.0238	18.5714
	10.119	12.0238	15.7143	19.0476
	9.64286	11.1905	16.1905	16.1905
	8.09524	11.3095	18.3929	21.5476

## Sheet: Figure 7D
FIG 7D-Relative mRNA levels of KIM-1 in renal tissue determined by real-time PCR (n = 6 per group).
treatment	Vehicle		AAI(3d)
	Vehicle	IL-19	Vehicle	IL-19
Relative KIM-1 mRNA expression	1.21841	1.69937	119.843	163.71
	0.955945	1.6077	132.055	152.747
	1.18509	2.0209	126.676	154.879
	1.25266	2.57576	144.507	146.525
	0.739694	2.76063	159.233	188.054
	0.744839	2.41999	136.712	194.685

## Sheet: Figure 7E
FIG 7E-Immunohistochemistry (IHC) and kidney injury molecule-1 (KIM-1) levels in kidney tissues (n = 6 per group).
treatment	Vehicle		AAI(3d)
	Vehicle	IL-19	Vehicle	IL-19
Postive area (%)	0.878	1.286	2.409	4.932
	1.06	0.705	3.037	4.713
	0.549	0.766	2.554	6.842
	1.155	1.633	3.778	4.543
	0.48	1.4	5.03	4.817
	1.364	0.593	3.352	5.378

## Sheet: Figure 7F
FIG 7F-Expression of kidney injury molecule-1 (KIM-1) protein in kidney tissues examined by western blotting (n = 6 per group).
treatment	Vehicle		AAI(3d)
	Vehicle	IL-19	Vehicle	IL-19
Ratio (KIM-1/β-actin)	0.965803	1.29689	3.01888	3.74685
	0.803276	1.39586	2.62708	3.94104
	0.997012	1.19025	2.46629	3.4155
	0.573348	1.71014	3.23216	3.08775
	1.33923	1.57363	2.46014	2.88365
	1.32133	1.93182	3.01329	3.07326

## Sheet: Figure 7G
FIG 7G-Detection of caspase-3 activity in kidney tissues (n = 5 per group).
treatment	Vehicle		AAI(3d)
	Vehicle	IL-19	Vehicle	IL-19
Caspase-3 activity(U/mg prot)	42.4404	47.0234	54.1062	61.2995
	48.0279	41.6543	55.6792	63.321
	45.1583	51.4657	58.8104	66.9659
	55.5918	43.0584	53.7718	65.1417
	44.3597	44.5682	55.4857	61.6271

## Sheet: Figure 7H
FIG 7H-Immunohistochemistry (IHC) and Cleaved-caspase-3 levels in kidney tissues (n = 6 per group).
treatment	Vehicle		AAI(3d)
	Vehicle	IL-19	Vehicle	IL-19
Postive area (%)	0.536	0.804	4.349	6.575
	0.916	1.466	3.481	5.47
	0.316	0.556	3.079	8.515
	0.68	0.621	6.582	6.96
	0.465	1.381	5.03	7.449
	0.431	0.74	3.352	5.967

## Sheet: Figure 7I
FIG 7I-TUNEL staining and analysis of kidney sections (n = 6 per group). Scale bar, 50 μm.
treatment	Vehicle		AAI(3d)
	Vehicle	IL-19	Vehicle	IL-19
Apoptosis (%)	0	0.56926	5.11848	11.1266
	0	0.0736377	6.38298	10.3632
	0	0.266667	5.10114	8.49598
	0.0984252	0.321543	3.89785	9.47712
	0	0.214133	4.4843	5.09421
	0	0	5.52536	7.6762
