# Supplementary material for: PSTPIP2 ameliorates aristolochic acid nephropathy by suppressing interleukin-19-mediated neutrophil extracellular trap formation
Source: eLife journal article supplement (doi:10.7554/elife.89740), 2024-02-05
Supplement: fig8-data1 [file elife-89740-fig8-data1-v2.zip]

## Sheet: Figure 8A
FIG 8A- Relative mRNA levels of TNF-α in renal tissue determined by real-time PCR (n = 6 per group).
treatment	Vehicle		AAI(3d)
	Vehicle	IL-19	Vehicle	IL-19
Relative TNF-α mRNA expression	0.936813	1.21069	3.59461	4.12912
	0.886279	1.16137	3.15105	4.39491
	1.02515	0.911196	3.17297	3.82599
	0.976596	0.943329	3.54512	3.69566
	0.880157	0.956498	4.27473	3.8526
	1.16137	0.949891	3.49631	4.21588

## Sheet: Figure 8B
FIG 8B- Relative mRNA levels of MCP-1 in renal tissue determined by real-time PCR (n = 6 per group).
treatment	Vehicle		AAI(3d)
	Vehicle	IL-19	Vehicle	IL-19
Relative MCP-1 mRNA expression	0.839441	0.924984	15.3217	22.2773
	1.10765	0.672451	14.7997	23.5475
	1.06992	0.569394	25.7678	28.7901
	0.86304	0.710792	22.7454	33.766
	1.25484	1.11535	21.9706	34.0009
	0.845279	0.881175	14.6975	28.3937

## Sheet: Figure 8E
FIG 8E-Western blot analysis of Cit-H3. Quantification of the Cit-H3/β-actin ratio (n = 6 per group).
treatment	Vehicle		AAI(3d)
	Vehicle	IL-19	Vehicle	IL-19
Ratio (Cit-H3/β-actin)	1.20195	0.980665	1.96643	2.64064
	1.1785	1.54799	2.33184	2.93234
	0.604144	0.39486	2.11589	2.41995
	0.546359	1.0611	2.24605	2.35764
	1.00494	1.27255	1.69854	2.53076
	1.46411	0.949651	2.08368	2.62866

## Sheet: Figure 8F
FIG 8F-Serum nucleosome level of mice(n = 6 per group).
treatment	Vehicle		AAI(3d)
	Vehicle	IL-19	Vehicle	IL-19
Fold increase vs.control	0.860795	1.07386	1.83239	3.95455
	0.988636	1.05682	2.5483	4.40625
	1.15909	1.10795	2.37784	3.46875
	1.14205	1.09091	1.7983	3.40057
	0.852273	1.10795	1.70455	3.28977
	0.997159	1.15909	1.40625	3.21307

## Sheet: Figure 8G
FIG 8G-Serum MPO level of mice(n = 6 per group).
treatment	Vehicle		AAI(3d)
	Vehicle	IL-19	Vehicle	IL-19
serum MPO level (pg/mL)	1412.4	1412.4	1582.8	1652.96
	1392.36	1392.36	1652.96	1642.93
	1422.43	1422.43	1472.54	1833.37
	1442.47	1442.47	1642.93	1673
	1362.29	1362.29	1582.8	1683.03
	1382.34	1382.34	1492.59	1713.09

## Sheet: Figure 8H
FIG 8H-Serum dsDNA level of mice(n = 6 per group).
treatment	Vehicle		AAI(3d)
	Vehicle	IL-19	Vehicle	IL-19
serum dsDNA (ng/mL)	1578.17	1587.23	2069.74	2561.31
	1478.57	1549.71	1875.7	2209.45
	1703.65	1600.16	1989.54	2354.33
	1692.01	1453.99	2067.15	2138.3
	1549.71	1512.2	2131.83	2281.89
	1360.85	1783.86	2109.84	2069.74
