# Supplementary material for: PSTPIP2 ameliorates aristolochic acid nephropathy by suppressing interleukin-19-mediated neutrophil extracellular trap formation
Source: eLife journal article supplement (doi:10.7554/elife.89740), 2024-02-05
Supplement: fig9-data1 [file elife-89740-fig9-data1-v2.zip]

## Sheet: Figure 9D
FIG 9D-Level of myeloperoxidase (MPO) in the cell culture supernatant assessed after treatment with different concentrations of IL-19 (n = 3).
Treatment rIL-19(ng/ml)	0	5	20	80
MPO level (pg/mL)	208.672	248.364	247.019	223.473
	212.036	261.147	257.11	226.837
	215.4	253.746	259.128	233.564

## Sheet: Figure 9E
FIG 9E-Level of dsDNA in the cell culture supernatant assessed after treatment with different concentrations of IL-19 (n = 3).
Treatment rIL-19(ng/ml)	0	5	20	80
dsDNA(ng/mL)	2353.05	2506.61	2496.08	2609.18
	2325.51	2332.62	2504.95	2494.6
	2380.21	2396.94	2614.35	2709.06

## Sheet: Figure 9F
FIG 9F-Level of nucleosomes in the cell culture supernatant assessed after treatment with different concentrations of IL-19 (n = 3).
Treatment rIL-19(ng/ml)	0	5	20	80
Fold increase vs.control	1.00648	0.951852	1.48241	1.62778
	0.974074	0.92963	1.56111	1.39352
	1.01944	0.934259	1.23056	1.88148

## Sheet: Figure 9G
FIG 9G-Protein levels of IL-20Rβ and citrullinated histone 3 (Cit-H3) assessed by western blotting after treatment with different concentrations of IL-19 (n = 5).
Treatment rIL-19(ng/ml)	0	5	20	80
Ratio (Cit-H3/β-actin)	0.70722	1.30636	2.57346	3.48415
	1.12541	1.22802	1.68986	1.71447
	1.32578	1.90345	1.69571	2.08509
	0.924849	1.23967	1.8051	2.08783
	0.916733	1.00975	1.89542	2.16563
Ratio (IL20Rβ /β-actin)	0.962496	1.63233	2.28174	3.11728
	0.946382	1.16547	1.76942	2.01503
	0.788057	1.94763	1.77782	1.8343
	0.909579	1.49321	1.86166	2.0817
	1.39349	1.71282	2.05361	2.84763
