# Supplementary material for: PSTPIP2 ameliorates aristolochic acid nephropathy by suppressing interleukin-19-mediated neutrophil extracellular trap formation
Source: eLife journal article supplement (doi:10.7554/elife.89740), 2024-02-05
Supplement: fig9-figsupp1-data1 [file elife-89740-fig9-figsupp1-data1-v2.zip]

## Sheet: Figure 9-figure supplement 1B
Figure 9-figure supplement 1B-Activity of caspase-3 quantified after treatment with different CMs (n = 3).
Group	Vehicle	AAI(40μM)	NETs orgine: rIL-19(80ng/mL)	AAI(40μM) +NETs orgine: rIL-19(80ng/mL
Caspase-3 activity (U/mg prot)	16.5918	23.231	16.3942	46.0429
	17.792	21.7747	16.963	44.849
	15.9029	19.4344	19.072	41.38

## Sheet: Figure 9-figure supplement 1C
Figure 9-figure supplement 1C-Protein levels of cleaved caspase-3 assessed by western blotting after treatment with different CMs (n = 3).
Group	Vehicle	AAI(40μM)	NETs orgine: rIL-19(80ng/mL)	AAI(40μM) +NETs orgine: rIL-19(80ng/mL
Ratio (CL-caspase-3/β-actin)	0.724423	1.02852	1.93392	5.98269
	0.775785	1.09731	1.57876	5.21806
	1.49979	1.57187	1.3437	4.51788

## Sheet: Figure 9-figure supplement 1E
Figure 9-figure supplement 1E-Level of apoptosis in mRTECs treated with different CMs detected using flow cytometry . Quantity of apoptotic mRTECs cultured with different CMs (n = 3).
Group	Vehicle	AAI(40μM)	NETs orgine: rIL-19(80ng/mL)	AAI(40μM) +NETs orgine: rIL-19(80ng/mL
Apoptosis cells(%)	6.01	6.83	11.77	29.17
	7.2	10.96	9.83	32.18
	6.54	8.43	13.08	27.03
