# Supplementary material for: PSTPIP2 ameliorates aristolochic acid nephropathy by suppressing interleukin-19-mediated neutrophil extracellular trap formation
Source: eLife journal article supplement (doi:10.7554/elife.89740), 2024-02-05
Supplement: fig10-data1 [file elife-89740-fig10-data1-v2.zip]

## Sheet: Figure 10B
FIG 10B-Western blotting results showed that the protein expression of phosphorylated IκBα and p65 was significantly increased after AAI stimulation. Overexpression of PSTPIP2 significantly reduced AAI-induced upregulation of phosphorylated IκBα and p65 proteins (n = 3).
Group	Vehicle	AAI(40μM)	pEGFP-C1+AAI(40μM)	pEGFP-C1/PSTPIP2+AAI(40μM)
Ratio (p-IκBα/IκBα)	1.08976	1.97875	2.09343	1.57458
	0.8152	1.96854	2.14644	1.91179
	1.09504	1.76845	2.20974	1.86992
Ratio (p-P65/P65)	1.07349	1.44929	1.30807	0.978518
	0.994693	1.27015	1.16772	0.884339
	0.931818	1.2809	1.1217	1.04215

## Sheet: Figure 10C
FIG 10C-Expression of NF-κB p65 in the nucleus and cytoplasm of various groups of mRTECs; β-actin and histone H3 were used as cytoplasmic and nuclear protein markers, respectively (n = 3).
Group	Cytoplasm		Group	Nucleus		Group	Cytoplasm		Group	Nucleus
	Vehicle	AAI(40μM)		Vehicle	AAI(40μM)		pEGFP-C1+AAI(40μM)	pEGFP-C1/PSTPIP2+AAI(40μM)		pEGFP-C1+AAI(40μM)	pEGFP-C1/PSTPIP2+AAI(40μM)
Ratio (P65/β-actin)	0.983116	0.881119	Ratio (P65/Histone-H3)	0.692662	3.09745	Ratio (P65/β-actin)	1.18744	1.7857	Ratio (P65/Histone-H3)	0.702491	0.293971
	1.05612	0.832536		1.34562	2.95538		0.873449	1.42952		1.08624	0.179037
	0.960761	0.844443		0.961718	2.88012		0.93911	1.50074		1.21127	0.197168

## Sheet: Figure 10F
FIG 10F-Western blot analysis of phosphorylated IκBα and p65 (n = 3).
Group	Vehicle	PDTC(25μM)	AAI(40μM)	PDTC(25μM)+AAI(40μM)
Ratio (p-IκBα/IκBα)	0.776379	1.05518	2.32471	1.67884
	1.18206	0.958553	1.96099	1.867
	1.04156	0.983885	2.01882	1.63707
Ratio (p-P65/P65)	1.06967	1.46182	2.59541	2.01265
	0.831688	1.87571	2.61258	1.8352
	1.09864	0.968311	2.43401	1.69142

## Sheet: Figure 10G
FIG 10G-mRNA level of IL-19 in AAI-treated mRTECs exposed to the NF-κB inhibitor PDTC (25 µM, 2 h) measured by qPCR (n = 3).
Group	Vehicle	PDTC(25μM)	AAI(40μM)	PDTC(25μM)+AAI(40μM)
Relative IL-19 mRNA expression	1.04729	1.20303	22.5752	6.01402
	0.900208	0.95705	20.2054	7.77224
	1.02692	1.29984	18.7436	9.05259
